# Supplementary material for: Tomato yellow leaf curl virus infection mitigates the heat stress response of plants grown at high temperatures
Source: PubMed Central journal article supplement (PMC4726131; doi:10.1038/srep19715), 2016-01-21
Supplement: srep19715-s1.pdf [file srep19715-s1.pdf]

# Supplementary Figure 1

***Tomato yellow leaf curl virus* infection mitigates the heat stress response of plants grown at high temperatures.**  
Anfoka G., Moshe A., Fridman L., Amrani L., Rotem O., Kolot M., Zeidan M., Czosnek H., Gorovits R.

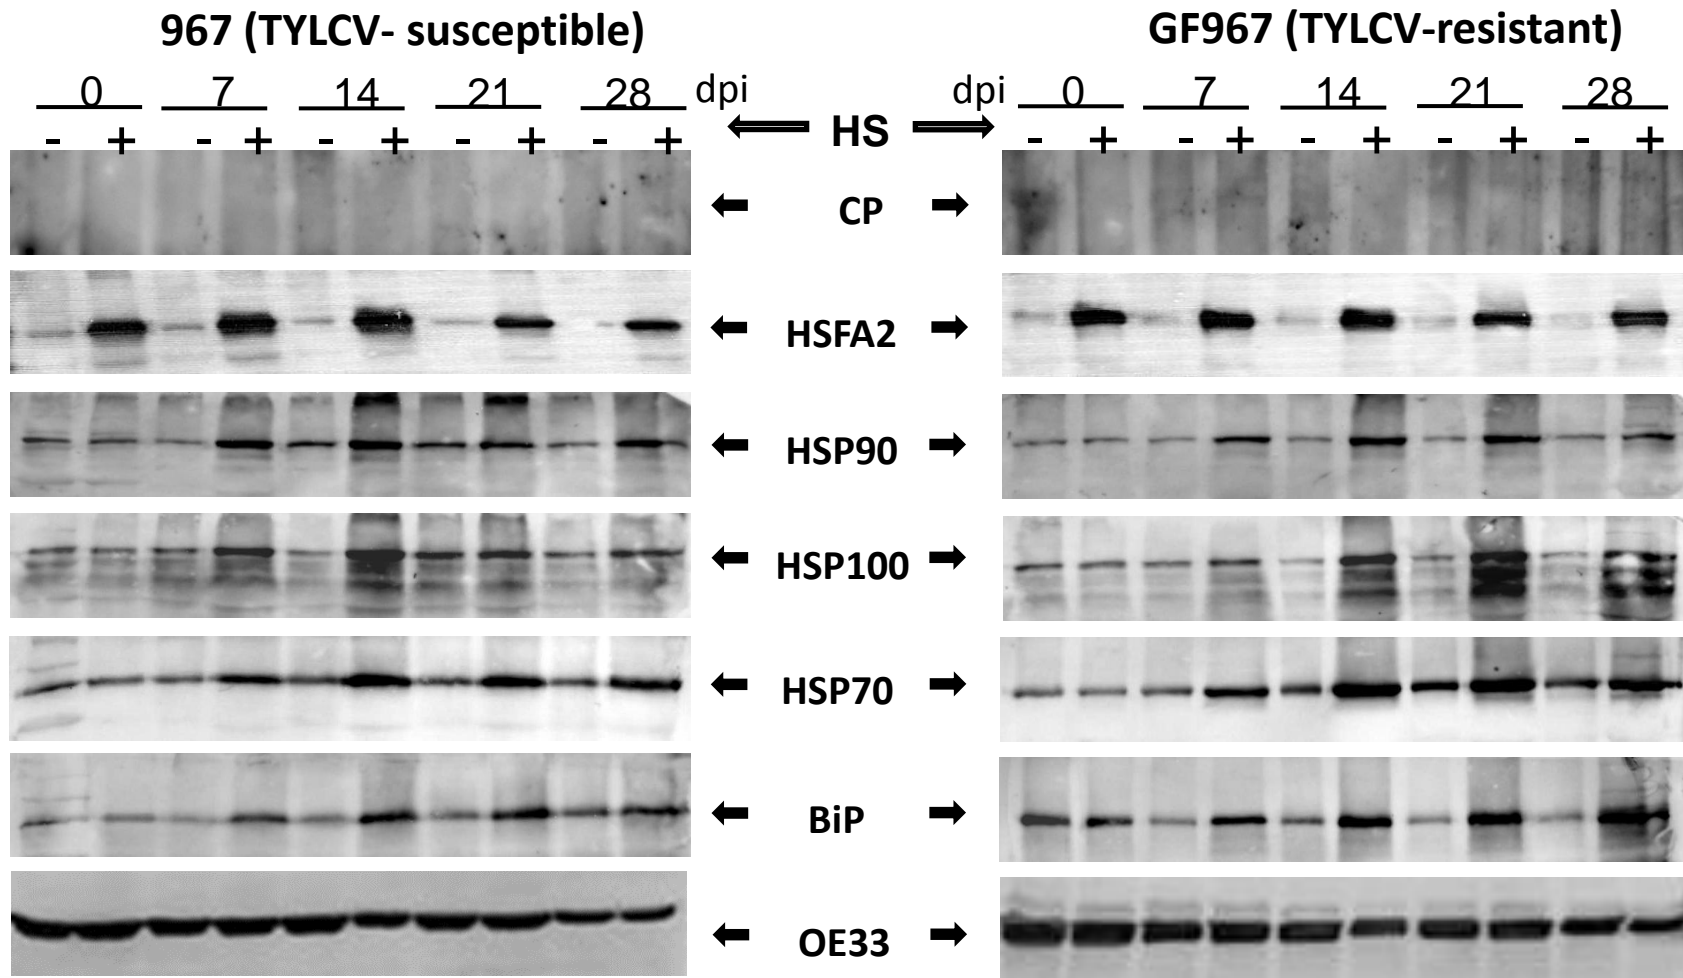

**Supplementary Figure 1. Comparative behavior of uninfected 967 and GF967 tomatoes at high (HS) and normal temperatures.** Immunodetection of plant transcription factor HSFA2 and HSP90, HSP100, HSP70, BiP in leaves of tomato grown at normal (-, regime 1) and high (+, regime 2) temperatures. The OE33 chloroplast protein was used as protein loading control. Compare with Fig. 3A.
